# Supplementary material
Source: MDPI journal article supplement (https://www.mdpi.com/2227-9717/11/10/2907)
Supplement: s1 [file s1]

**Table S15.** Frequency (%) of the bacterial species isolated from the rhizosphere of *Cleome arabica* (CA), *Pulicaria undulata* (PU), *Reseda villosa* (RV), *Zilla spinosa* (ZS), *Artemisia herba halba* (AHA), *Arthrophytum scoparium* (AS), *Astragalus armatus* (AA), *Atriplex halimus* (AH), *Peganum harmala* (PH), *Retama raetam* (RR), *Suaeda fruticosa* (SF), *Salsola tetragona* (SAT), *Stipa tenacissima* (ST) and *Thymelalea microphylla* (TM). A= arid SA=Semi-arid.

[illegible]

|                                         |       |      |      |      |       |       |       |      |       |      |       |       |       |      |
|-----------------------------------------|-------|------|------|------|-------|-------|-------|------|-------|------|-------|-------|-------|------|
| <i>Bacillus oceanisediminis</i>         | 0.00  | 0.00 | 0.00 | 0.00 | 0.00  | 0.00  | 0.00  | 0.00 | 0.00  | 0.00 | 10.00 | 18.18 | 0.00  | 0.00 |
| <i>Bacillus simplex</i>                 | 4.35  | 4.76 | 0.00 | 0.00 | 10.53 | 15.79 | 0.00  | 0.00 | 13.64 | 9.52 | 10.00 | 0.00  | 0.00  | 4.76 |
| <i>Bacillus subtilis</i>                | 21.74 | 9.52 | 4.55 | 0.00 | 0.00  | 0.00  | 0.00  | 9.52 | 0.00  | 0.00 | 15.00 | 4.55  | 0.00  | 0.00 |
| <i>Brevundimonas sp.</i>                | 0.00  | 0.00 | 4.55 | 0.00 | 0.00  | 0.00  | 0.00  | 0.00 | 0.00  | 0.00 | 0.00  | 0.00  | 0.00  | 0.00 |
| <i>Cellulosimicrobium sp.</i>           | 0.00  | 0.00 | 0.00 | 0.00 | 0.00  | 0.00  | 0.00  | 0.00 | 0.00  | 4.76 | 0.00  | 0.00  | 0.00  | 0.00 |
| <i>Domibacillus sp.</i>                 | 0.00  | 0.00 | 0.00 | 4.55 | 0.00  | 5.26  | 0.00  | 0.00 | 0.00  | 0.00 | 0.00  | 0.00  | 0.00  | 0.00 |
| <i>Fictibacillus arsenicus</i>          | 0.00  | 0.00 | 0.00 | 0.00 | 0.00  | 5.26  | 0.00  | 0.00 | 0.00  | 0.00 | 0.00  | 4.55  | 0.00  | 0.00 |
| <i>Fictibacillus barbaricus</i>         | 0.00  | 4.76 | 0.00 | 0.00 | 0.00  | 0.00  | 0.00  | 0.00 | 0.00  | 0.00 | 0.00  | 0.00  | 0.00  | 0.00 |
| <i>Filifactor sp.</i>                   | 0.00  | 0.00 | 0.00 | 0.00 | 0.00  | 0.00  | 0.00  | 0.00 | 4.55  | 0.00 | 0.00  | 0.00  | 0.00  | 0.00 |
| <i>Kocuria sp.</i>                      | 0.00  | 0.00 | 4.55 | 0.00 | 0.00  | 0.00  | 0.00  | 0.00 | 0.00  | 0.00 | 0.00  | 0.00  | 0.00  | 4.76 |
| <i>Kocuria rosea</i>                    | 0.00  | 0.00 | 0.00 | 0.00 | 0.00  | 5.26  | 0.00  | 0.00 | 0.00  | 0.00 | 0.00  | 0.00  | 0.00  | 4.76 |
| <i>Lactobacillus sp.</i>                | 0.00  | 0.00 | 0.00 | 4.55 | 0.00  | 0.00  | 0.00  | 0.00 | 0.00  | 0.00 | 0.00  | 0.00  | 10.53 | 0.00 |
| <i>Massilia timonae</i>                 | 0.00  | 0.00 | 0.00 | 0.00 | 0.00  | 0.00  | 0.00  | 4.76 | 0.00  | 0.00 | 0.00  | 0.00  | 0.00  | 4.76 |
| <i>Methylobacterium sp.</i>             | 0.00  | 4.76 | 0.00 | 0.00 | 0.00  | 0.00  | 0.00  | 0.00 | 0.00  | 0.00 | 0.00  | 0.00  | 0.00  | 0.00 |
| <i>Microbacterium sp.</i>               | 0.00  | 0.00 | 4.55 | 0.00 | 0.00  | 0.00  | 0.00  | 0.00 | 0.00  | 0.00 | 0.00  | 0.00  | 0.00  | 0.00 |
| <i>Microbacterium<br/>arborescens</i>   | 0.00  | 0.00 | 0.00 | 0.00 | 0.00  | 0.00  | 0.00  | 4.76 | 0.00  | 0.00 | 0.00  | 0.00  | 0.00  | 4.76 |
| <i>Microbacterium<br/>paludicola</i>    | 0.00  | 0.00 | 0.00 | 0.00 | 0.00  | 0.00  | 0.00  | 0.00 | 0.00  | 4.76 | 0.00  | 0.00  | 0.00  | 0.00 |
| <i>Micrococcus luteus</i>               | 0.00  | 9.52 | 0.00 | 0.00 | 0.00  | 0.00  | 0.00  | 0.00 | 9.09  | 0.00 | 0.00  | 0.00  | 0.00  | 0.00 |
| <i>Oceanobacillus sp.</i>               | 0.00  | 0.00 | 0.00 | 0.00 | 0.00  | 0.00  | 0.00  | 4.76 | 0.00  | 0.00 | 0.00  | 0.00  | 0.00  | 0.00 |
| <i>Paenarthrobacter<br/>aurescens</i>   | 0.00  | 0.00 | 0.00 | 0.00 | 0.00  | 0.00  | 0.00  | 0.00 | 0.00  | 4.76 | 0.00  | 0.00  | 0.00  | 0.00 |
| <i>Paenibacillus sp.</i>                | 0.00  | 4.76 | 4.55 | 0.00 | 0.00  | 0.00  | 0.00  | 4.76 | 0.00  | 0.00 | 0.00  | 0.00  | 5.26  | 4.76 |
| <i>Paenibacillus<br/>amylolyticus</i>   | 0.00  | 0.00 | 0.00 | 0.00 | 0.00  | 5.26  | 0.00  | 0.00 | 4.55  | 0.00 | 0.00  | 0.00  | 5.26  | 0.00 |
| <i>Paenibacillus<br/>glucanolyticus</i> | 0.00  | 4.76 | 9.09 | 0.00 | 0.00  | 5.26  | 11.76 | 4.76 | 13.64 | 0.00 | 0.00  | 0.00  | 0.00  | 0.00 |
| <i>Paenibacillus<br/>illinoisensis</i>  | 0.00  | 0.00 | 0.00 | 0.00 | 0.00  | 5.26  | 0.00  | 0.00 | 0.00  | 0.00 | 0.00  | 0.00  | 0.00  | 0.00 |
| <i>Paenibacillus lactis</i>             | 0.00  | 0.00 | 0.00 | 0.00 | 0.00  | 0.00  | 0.00  | 4.76 | 0.00  | 0.00 | 0.00  | 0.00  | 0.00  | 0.00 |
| <i>Paenibacillus pabuli</i>             | 0.00  | 4.76 | 0.00 | 0.00 | 0.00  | 0.00  | 0.00  | 0.00 | 0.00  | 0.00 | 0.00  | 0.00  | 0.00  | 0.00 |
| <i>Pseudoarthrobacter sp.</i>           | 0.00  | 0.00 | 0.00 | 0.00 | 15.79 | 0.00  | 0.00  | 4.76 | 13.64 | 9.52 | 5.00  | 9.09  | 15.79 | 4.76 |

|                                   |       |      |      |      |      |      |       |      |      |      |      |      |       |       |
|-----------------------------------|-------|------|------|------|------|------|-------|------|------|------|------|------|-------|-------|
| <i>Pseudoarthrobacter oxydans</i> | 0.00  | 0.00 | 0.00 | 0.00 | 0.00 | 0.00 | 0.00  | 9.52 | 0.00 | 0.00 | 5.00 | 4.55 | 0.00  | 14.29 |
| <i>Pseudomonas</i> sp.            | 0.00  | 0.00 | 0.00 | 4.55 | 0.00 | 5.26 | 0.00  | 0.00 | 0.00 | 0.00 | 0.00 | 9.09 | 10.53 | 0.00  |
| <i>Pseudomonas brassicacearum</i> | 0.00  | 0.00 | 0.00 | 0.00 | 0.00 | 0.00 | 0.00  | 0.00 | 0.00 | 4.76 | 0.00 | 0.00 | 0.00  | 0.00  |
| <i>Pseudomonas corrugata</i>      | 0.00  | 0.00 | 0.00 | 0.00 | 0.00 | 0.00 | 0.00  | 0.00 | 0.00 | 4.76 | 5.00 | 0.00 | 0.00  | 0.00  |
| <i>Pseudomonas chlororaphis</i>   | 0.00  | 0.00 | 0.00 | 0.00 | 0.00 | 5.26 | 0.00  | 0.00 | 0.00 | 4.76 | 5.00 | 0.00 | 0.00  | 0.00  |
| <i>Pseudomonas thivervalensis</i> | 0.00  | 0.00 | 0.00 | 0.00 | 0.00 | 5.26 | 0.00  | 0.00 | 0.00 | 4.76 | 0.00 | 0.00 | 0.00  | 0.00  |
| <i>Saccharibacillus</i> sp.       | 0.00  | 0.00 | 0.00 | 0.00 | 0.00 | 0.00 | 0.00  | 0.00 | 0.00 | 0.00 | 0.00 | 4.55 | 0.00  | 0.00  |
| <i>Sporosarcina</i> sp.           | 0.00  | 0.00 | 0.00 | 0.00 | 5.26 | 0.00 | 0.00  | 0.00 | 0.00 | 0.00 | 0.00 | 0.00 | 0.00  | 0.00  |
| <i>Staphylococcus epidermidis</i> | 0.00  | 0.00 | 0.00 | 4.55 | 5.26 | 0.00 | 11.76 | 0.00 | 0.00 | 0.00 | 0.00 | 0.00 | 0.00  | 9.52  |
| <i>Staphylococcus warneri</i>     | 0.00  | 4.76 | 0.00 | 0.00 | 0.00 | 0.00 | 0.00  | 0.00 | 0.00 | 0.00 | 0.00 | 0.00 | 0.00  | 0.00  |
| <i>Stenotrophomonas</i> sp.       | 0.00  | 0.00 | 0.00 | 0.00 | 0.00 | 0.00 | 0.00  | 0.00 | 0.00 | 0.00 | 5.00 | 0.00 | 0.00  | 0.00  |
| <i>Streptomyces</i> sp.           | 17.39 | 0.00 | 0.00 | 9.09 | 0.00 | 5.26 | 0.00  | 4.76 | 4.55 | 0.00 | 5.00 | 0.00 | 0.00  | 9.52  |
| <i>Variovorax paradoxus</i>       | 0.00  | 0.00 | 0.00 | 0.00 | 0.00 | 0.00 | 0.00  | 0.00 | 0.00 | 4.76 | 0.00 | 0.00 | 0.00  | 0.00  |
