# Supplementary material
Source: MDPI journal article supplement (https://www.mdpi.com/2227-9717/11/10/2907)
Supplement: s1 [file s1]

**Table S17.** Root architecture of inoculated or not cucumber seeds at 7 days of growth described by the determination of Total root length, total surface area, total root volume, number of tips and root branching performed through WinRhizo analysis. Different letters indicate significant differences between the control (C) and the treatments at  $p \leq 0.05$ .

| Treatment | Total length (cm) | Surface area (cm <sup>2</sup> ) | Volume (cm <sup>3</sup> ) | Tip number  | Root Branching degree |
|-----------|-------------------|---------------------------------|---------------------------|-------------|-----------------------|
| C         | 29.88±3.88a       | 5.95±0.73a                      | 0.01±0.01a                | 40.78±4.53a | 1.41±0.09a            |
| CA1       | 31.15±2.98a       | 6.71±0.67a                      | 0.12±0.01a                | 38.55±3.67a | 1.21±0.07b            |
| CA4       | 23.71±2.03a       | 5.25±0.43a                      | 0.09±0.01a                | 36.60±2.74a | 1.49±0.11a            |
| CA9       | 26.13±2.71a       | 5.60±0.64a                      | 0.10±0.02a                | 33.31±3.83a | 1.20±0.06b            |
| CA19      | 15.01±1.39b       | 3.34±0.39b                      | 0.06±0.01b                | 21.96±1.90b | 1.34±0.08a            |
|           |                   |                                 |                           |             |                       |
| C         | 30.04±1.22a       | 6.03±0.26a                      | 0.10±0.01a                | 42.68±2.32a | 1.37±0.07a            |
| PU4       | 37.13±2.19b       | 7.54±0.42b                      | 0.12±0.01b                | 51.16±2.61a | 1.37±0.07a            |
| PU5       | 27.79±2.21a       | 5.85±0.43a                      | 0.10±0.01a                | 43.24±3.01a | 1.55±0.08a            |
| PU10      | 25.88±1.59a       | 5.87±0.27a                      | 0.11±0.01a                | 43.84±2.89a | 1.63±0.08b            |
| PU23      | 28.35±1.85a       | 6.18±0.34a                      | 0.11±0.01a                | 41.08±3.56a | 1.41±0.09a            |
| PU24      | 31.35±1.99a       | 6.69±0.37a                      | 0.11±0.01a                | 39.60±2.11a | 1.24±0.06a            |
|           |                   |                                 |                           |             |                       |
| C         | 33.90±3.30a       | 7.57±0.66a                      | 0.14±0.01a                | 44.05±4.25a | 0.73±0.02a            |
| RV3       | 15.82±1.79b       | 3.51±0.36b                      | 0.06±0.01b                | 22.27±2.40b | 0.73±0.02a            |
| RV4       | 17.68±1.71b       | 4.06±0.37b                      | 0.10±0.01b                | 22.63±2.08b | 0.75±0.03a            |
| RV6       | 13.41±0.86b       | 3.09±0.17b                      | 0.06±0.01b                | 22.00±1.77b | 0.76±0.03a            |
| RV10      | 28.29±2.73a       | 6.06±0.51b                      | 0.11±0.01b                | 38.18±3.24a | 0.72±0.03a            |
| RV14      | 40.02±2.47a       | 8.64±0.48a                      | 0.15±0.01a                | 48.45±2.90a | 0.70±0.02a            |
| RV18      | 38.67±2.40a       | 7.62±0.43a                      | 0.12±0.01a                | 43.43±3.21a | 0.64±0.02b            |
| RV21      | 33.23±2.24a       | 7.34±0.46a                      | 0.13±0.01a                | 45.42±3.81a | 0.72±0.02a            |
| RV22      | 33.63±2.56a       | 7.30±0.54a                      | 0.13±0.01a                | 45.50±3.09a | 0.70±0.02a            |
|           |                   | H                               |                           |             |                       |
| C         | 43.18±2.18a       | 8.48±0.40a                      | 0.12±0.01a                | 52.77±3.27a | 1.17±0.07a            |
| ZS5       | 54.52±2.15b       | 9.46±0.34a                      | 0.13±0.01a                | 62.55±3.41a | 1.17±0.06a            |
| ZS8       | 38.89±2.74a       | 8.03±0.59a                      | 0.14±0.02a                | 59.23±3.46a | 1.50±0.07b            |
| ZS11      | 41.53±2.74a       | 7.30±0.48a                      | 0.10±0.01a                | 60.36±3.12a | 1.45±0.08b            |
| ZS13      | 55.70±2.55b       | 9.76±0.45a                      | 0.14±0.01a                | 79.86±4.31b | 1.46±0.07b            |
| ZS15      | 40.18±1.41a       | 7.50±0.31a                      | 0.11±0.01a                | 59.55±3.10a | 1.46±0.05b            |
| ZS17      | 42.02±2.68a       | 7.90±0.48a                      | 0.12±0.01a                | 50.68±3.63a | 1.23±0.06a            |
| ZS25      | 35.77±4.01b       | 7.20±0.71a                      | 0.12±0.01a                | 55.14±4.61a | 1.63±0.13b            |
|           |                   |                                 |                           |             |                       |
| C         | 28.79±1.71 a      | 6.85±1.71a                      | 0.13±0.01a                | 30.15±7.69a | 1.76±0.35a            |
| AHA9      | 45.35±2.27 b      | 8.81±2.27b                      | 0.30±0.02b                | 61.16±3.92b | 1.29±0.05b            |
| AHA11     | 39.39±2.19 b      | 8.14±2.19b                      | 0.13±0.01a                | 47.82±2.86a | 1.19±0.05b            |
| AHA13     | 30.72±2.02 a      | 7.13±2.02a                      | 0.15±0.01a                | 43.08±3.21a | 1.34±0.06b            |
| AHA15     | 37.36±1.75 b      | 8.24±1.75b                      | 0.15±0.01a                | 49.13±2.77a | 1.28±0.06b            |
| AHA17     | 31.20±1.47 a      | 7.60±1.47a                      | 0.17±0.01a                | 31.50±1.58b | 0.97±0.05b            |
| AHA20     | 28.36±1.72 a      | 8.12±1.72b                      | 0.15±0.01a                | 37.93±2.65b | 1.30±0.08b            |
| AHA23     | 27.85±1.87 a      | 7.20±1.87a                      | 0.15±0.01a                | 28.85±1.84b | 0.99±0.05b            |
| AHA24     | 24.32±1.54 a      | 5.04±1.54b                      | 0.09±0.01a                | 30.15±2.42b | 1.17±0.07b            |
|           |                   |                                 |                           |             |                       |
| C         | 28.79±1.71a       | 6.84±0.40a                      | 0.13±0.01a                | 49.84±7.69a | 1.42±0.09a            |
| AS1       | 26.45±2.20a       | 5.77±0.39a                      | 0.10±0.01b                | 31.41±3.12b | 1.10±0.07b            |
| AS4       | 29.35±2.21a       | 6.62±0.46a                      | 0.11±0.01a                | 37.25±2.34b | 1.33±0.09a            |
| AS5       | 33.47±2.26a       | 8.01±0.53a                      | 0.14±0.01a                | 50.48±2.92a | 1.50±0.06a            |
| AS6       | 34.88±2.27b       | 8.08±0.63a                      | 0.14±0.01a                | 44.63±2.78a | 1.24±0.06a            |
| AS15      | 29.72±1.75a       | 7.02±0.40a                      | 0.13±0.01a                | 39.96±2.82b | 1.27±0.07a            |
| AS20      | 31.14±1.94a       | 7.35±0.43a                      | 0.13±0.01a                | 39.27±1.99a | 1.25±0.08a            |

|       |             |            |            |             |            |
|-------|-------------|------------|------------|-------------|------------|
| AS25  | 33.35±2.03a | 7.68±0.45a | 0.14±0.01a | 46.00±2.97a | 1.35±0.07b |
|       |             |            |            |             |            |
| C     | 40.1±3.10a  | 7.69±0.53a | 0.12±0.01a | 44.83±3.24a | 1.11±0.05a |
| AA2   | 32.1±2.61b  | 6.02±0.57b | 0.09±0.01b | 50.59±4.51a | 1.51±0.07b |
| AA5   | 34.0±2.85a  | 6.56±0.53a | 0.10±0.01a | 48.35±3.99a | 1.39±0.07b |
| AA9   | 27.4±2.20b  | 6.64±0.54a | 0.13±0.01a | 52.33±5.21a | 1.83±0.10b |
| AA12  | 35.9±2.59a  | 7.02±0.48a | 0.11±0.01a | 51.64±4.10a | 1.39±0.06b |
| AA14  | 38.4±3.17a  | 7.31±0.54a | 0.11±0.01a | 47.35±3.84a | 1.29±0.13a |
|       |             |            |            |             |            |
| C     | 34.59±2.76a | 7.41±0.54a | 0.13±0.01a | 39.71±3.01a | 1.15±0.06a |
| AH3   | 27.11±1.87b | 5.45±0.32b | 0.09±0.01b | 35.31±2.96a | 1.22±0.07a |
| AH4   | 29.48±2.52a | 5.82±0.47b | 0.09±0.01b | 35.77±2.27a | 1.22±0.06a |
| AH6   | 30.15±1.99a | 6.38±0.44a | 0.11±0.01a | 35.73±2.39a | 1.17±0.06a |
| AH7   | 30.25±1.95a | 6.45±0.38a | 0.11±0.01a | 37.28±2.57a | 1.17±0.05a |
| AH12  | 28.27±2.12a | 6.08±0.38b | 0.11±0.01a | 35.54±2.16a | 1.27±0.07a |
| AH18  | 30.90±2.42a | 7.14±0.45a | 0.14±0.01a | 37.45±2.50a | 1.22±0.08a |
| AH24  | 41.36±3.40a | 8.72±0.64a | 0.15±0.01a | 61.89±5.75b | 1.49±0.08b |
|       |             |            |            |             |            |
| C     | 36.10±2.36a | 7.64±0.49a | 0.12±0.01a | 50.97±3.39a | 1.41±0.09a |
| PH1   | 31.66±3.31a | 6.37±0.64a | 0.10±0.01a | 43.87±4.08a | 1.36±0.07a |
| PH4   | 37.53±2.04a | 7.54±0.35a | 0.12±0.01a | 44.47±2.80a | 1.18±0.09a |
| PH6   | 40.32±3.18a | 8.22±0.57a | 0.12±0.01a | 52.23±5.20a | 1.43±0.07a |
| PH11  | 36.90±2.53a | 7.46±0.50a | 0.12±0.01a | 44.59±3.06a | 1.17±0.06a |
| PH12  | 29.36±3.16a | 5.99±0.58b | 0.12±0.01a | 38.18±3.83a | 1.37±0.11a |
| PH13  | 40.18±3.20a | 8.28±0.57a | 0.13±0.01a | 53.52±4.28a | 1.34±0.09a |
| PH17  | 37.73±2.02a | 7.87±0.44a | 0.13±0.01a | 40.90±2.91a | 1.28±0.06a |
| PH21  | 41.78±2.69a | 8.16±0.48a | 0.13±0.01a | 48.04±4.28a | 1.08±0.06a |
| PH24  | 40.74±2.99a | 8.28±0.48a | 0.13±0.01a | 51.35±3.82a | 1.28±0.09a |
|       |             |            |            |             |            |
| C     | 28.79±1.71a | 6.84±0.40a | 0.13±0.01a | 49.85±7.69a | 1.76±0.35a |
| RR3   | 19.63±1.75b | 2.42±0.35b | 0.08±0.01b | 27.55±2.60b | 1.31±0.06b |
| RR5   | 22.06±2.08b | 5.72±0.39b | 0.12±0.01a | 31.25±4.85b | 1.19±0.13b |
| RR10  | 28.91±1.95a | 6.54±0.38a | 0.12±0.01a | 28.54±2.50a | 1.29±0.06b |
| RR11  | 31.71±2.18a | 7.31±0.44a | 0.14±0.01a | 40.50±2.41a | 1.25±0.05b |
| RR16  | 29.94±1.58a | 7.26±0.33a | 0.14±0.01a | 40.05±2.55a | 1.47±0.08a |
| RR20  | 42.19±2.22b | 8.36±0.43b | 0.13±0.01a | 57.17±4.32a | 1.29±0.06b |
| RR21  | 29.71±2.62a | 7.02±0.50a | 0.13±0.01a | 41.29±3.92a | 1.36±0.08b |
| RR22  | 30.21±2.31a | 6.52±0.43a | 0.12±0.01a | 42.92±2.60a | 1.42±0.07b |
|       |             |            |            |             |            |
| C     | 31.60±1.64a | 6.27±0.30a | 0.10±0.01a | 44.56±2.44a | 1.37±0.07a |
| SF1   | 36.20±1.61a | 7.55±0.32b | 0.13±0.01b | 47.67±3.18a | 1.27±0.08a |
| SF2   | 34.72±1.69a | 7.05±0.31a | 0.11±0.01a | 47.00±2.90a | 1.31±0.07a |
| SF4   | 22.83±1.71b | 4.52±0.29b | 0.07±0.01b | 34.20±2.19b | 1.50±0.10a |
| SF6   | 30.83±2.39a | 6.65±0.48a | 0.12±0.01a | 44.75±2.68a | 1.48±0.08a |
| SF7   | 36.91±1.53b | 7.92±0.28b | 0.14±0.01b | 50.04±2.49a | 1.31±0.05a |
| SF13  | 33.73±2.11a | 7.06±0.41a | 0.12±0.01a | 43.11±2.43a | 1.28±0.07a |
| SF18  | 33.75±1.37a | 6.95±0.25a | 0.12±0.01a | 43.64±1.70a | 1.26±0.05a |
| SF23  | 32.06±2.55a | 6.78±0.49a | 0.11±0.01a | 46.44±4.44a | 1.37±0.08a |
| SF25  | 35.81±2.36a | 7.17±0.42a | 0.12±0.01a | 46.66±3.36a | 1.24±0.05a |
|       |             |            |            |             |            |
| C     | 31.60±1.64a | 6.27±0.30a | 0.10±0.01a | 44.56±2.44a | 1.37±0.07a |
| SAT3  | 28.75±2.18a | 6.50±0.50a | 0.12±0.01a | 45.29±3.53a | 1.43±0.07a |
| SAT5  | 36.21±1.88a | 7.49±0.30b | 0.13±0.01b | 50.71±2.56a | 1.37±0.05a |
| SAT6  | 38.16±1.74b | 7.59±0.34b | 0.12±0.01a | 47.89±2.73a | 1.22±0.06a |
| SAT9  | 30.68±1.87a | 6.69±0.39a | 0.12±0.01a | 44.07±2.50a | 1.42±0.07a |
| SAT10 | 36.05±1.92a | 7.87±0.39b | 0.14±0.01b | 49.48±3.09a | 1.33±0.06a |

|       |             |             |            |             |            |
|-------|-------------|-------------|------------|-------------|------------|
| SAT13 | 33.42±1.86a | 7.01±0.36a  | 0.12±0.01a | 43.35±2.68a | 1.24±0.04a |
| SAT21 | 30.40±1.86a | 6.67±0.37a  | 0.12±0.01a | 45.20±3.48a | 1.50±0.07a |
|       |             |             |            |             |            |
| C     | 31.60±1.64a | 6.27±0.30a  | 0.10±0.01a | 44.57±2.44a | 1.37±0.07a |
| ST4   | 36.61±2.39a | 8.04±0.48b  | 0.14±0.01b | 50.78±3.15a | 1.38±0.07a |
| ST6   | 38.07±1.77b | 7.99±0.32b  | 0.13±0.01b | 56.12±3.07b | 1.46±0.09a |
| ST10  | Nd*         | Nd*         | Nd*        | Nd*         | Nd*        |
| ST12  | 47.63±2.41b | 9.73±0.47b  | 0.16±0.01b | 64.92±3.13b | 1.34±0.05a |
| ST15  | 39.62±2.44b | 8.18±0.42b  | 0.14±0.01b | 52.68±3.54a | 1.28±0.05a |
| ST16  | 38.44±2.26b | 8.56±0.40b  | 0.15±0.01b | 55.57±3.19b | 1.44±0.07a |
| ST18  | 38.97±2.34b | 8.15±0.43b  | 0.14±0.01b | 56.35±3.64b | 1.40±0.06a |
|       |             |             |            |             |            |
| C     | 20.71±2.27a | 7.25±1.02a  | 0.21±0.04a | 20.2±1.58a  | 1.01±0.09a |
| TM7   | 25.27±2.12a | 10.31±0.83b | 0.34±0.03b | 15.56±1.28b | 0.55±0.03b |
| TM12  | 16.87±1.69a | 6.77±0.75a  | 0.22±0.03a | 13.20±1.00b | 0.70±0.04b |
| TM15  | 23.01±1.90a | 8.92±0.69a  | 0.28±0.02a | 16.92±1.27a | 0.66±0.04b |
| TM29  | 20.12±1.79a | 7.78±0.70a  | 0.25±0.02a | 13.28±1.36b | 0.55±0.04b |
