# Supplementary material
Source: MDPI journal article supplement (https://www.mdpi.com/2227-9717/11/10/2907)
Supplement: s1 [file s1]

**Table S16.** Plant beneficial physiological traits of the 95 selected bacterial strains: siderophore synthesis on CAS medium, phosphate solubilisation activity on di- and tri-calcium phosphate (DCP and TCP medium, respectively) and indole-acetic acid (IAA) production.

| Strain                                    | Siderophore | Phosphate solubilization (DCP) | Phosphate solubilization (TCP) | IAA |
|-------------------------------------------|-------------|--------------------------------|--------------------------------|-----|
| <i>Domibacillus</i> sp.CA1                | -           | +                              | +                              | +   |
| <i>Bacillus endophyticus</i> CA4          | -           | +                              | -                              | -   |
| <i>Bacillus niacin</i> CA9                | -           | -                              | -                              | +   |
| <i>Arthrobacter crystallopoietes</i> CA19 | -           | -                              | -                              | -   |
| <i>Bacillus licheniformis</i> PU4         | -           | -                              | +                              | -   |
| <i>Bacillus mojavenensis</i> PU5          | +           | +                              | +                              | -   |
| <i>Microbacterium arborescens</i> PU10    | -           | +                              | +                              | -   |
| <i>Kocuria</i> sp. PU23                   | -           | -                              | -                              | -   |
| <i>Kocuria rosea</i> PU24                 | -           | -                              | -                              | -   |
| <i>Fictibacillus barbaricus</i> RV3       | -           | -                              | -                              | -   |
| <i>Bacillus endophyticus</i> RV4          | -           | +                              | +                              | -   |
| <i>Paenibacillus pabuli</i> RV6           | -           | +                              | +                              | -   |
| <i>Bacillus atrophaeus</i> RV10           | +           | -                              | -                              | -   |
| <i>Micrococcus luteus</i> RV14            | -           | -                              | +                              | -   |
| <i>Bacillus simplex</i> RV18              | -           | +                              | +                              | -   |
| <i>Bacillus subtilis</i> RV21             | -           | +                              | +                              | -   |
| <i>Paenibacillus glucanolyticus</i> RV22  | -           | -                              | -                              | -   |
| <i>Bacillus mojavenensis</i> ZS5          | +           | -                              | -                              | -   |
| <i>Bacillus beringensis</i> ZS8           | -           | +                              | -                              | -   |
| <i>Bacillus subtilis</i> ZS11             | +           | +                              | +                              | -   |
| <i>Paenibacillus glucanolyticus</i> ZS13  | -           | -                              | -                              | -   |
| <i>Pseudoarthrobacter oxydans</i> ZS15    | -           | +                              | -                              | -   |
| <i>Microbacterium</i> sp. ZS17            | -           | +                              | -                              | -   |
| <i>Paenibacillus lacyis</i> ZS25          | -           | -                              | -                              | -   |
| <i>Bacillus indicus</i> AHA9              | -           | -                              | -                              | -   |
| <i>Pseudomonas thivervalensis</i> AHA11   | -           | +                              | +                              | -   |
| <i>Bacillus idriensis</i> AHA13           | -           | -                              | +                              | -   |
| <i>Bacillus simplex</i> AHA15             | -           | -                              | +                              | +   |
| <i>Cellulosimicrobium</i> sp. AHA17       | -           | -                              | +                              | -   |
| <i>Pseudomonas</i> sp. AHA20              | -           | +                              | +                              | -   |
| <i>Microbacterium paludicola</i> AHA23    | -           | -                              | -                              | +   |
| <i>Bacillus endophyticus</i> AHA24        | -           | +                              | +                              | -   |
| <i>Bacillus cibi</i> AS1                  | +           | +                              | +                              | -   |
| <i>Bacillus niacini</i> AS4               | -           | +                              | -                              | -   |
| <i>Bacillus simplex</i> AS5               | -           | +                              | +                              | -   |
| <i>Bacillus indicus</i> AS6               | -           | -                              | -                              | -   |
| <i>Bacillus subtilis</i> AS15             | +           | +                              | +                              | -   |
| <i>Bacillus atrophaeus</i> AS20           | +           | +                              | -                              | -   |
| <i>Bacillus muralis</i> AS25              | -           | -                              | +                              | -   |
| <i>Bacillus atrophaeus</i> AA2            | +           | -                              | -                              | -   |
| <i>Bacillus niacini</i> AA5               | -           | -                              | -                              | -   |
| <i>Bacillus simplex</i> AA9               | -           | -                              | +                              | -   |
| <i>Sporosarcina</i> sp. AA12              | -           | -                              | -                              | +   |
| <i>Bacillus muralis</i> AA14              | -           | -                              | +                              | +   |
| <i>Bacillus atrophaeus</i> AH3            | +           | +                              | +                              | -   |
| <i>Bacillus muralis</i> AH4               | -           | -                              | +                              | -   |
| <i>Paenibacillus amylolyticus</i> AH6     | -           | -                              | -                              | -   |
| <i>Pseudoarthrobacter</i> sp. AH7         | -           | -                              | -                              | -   |
| <i>Paenibacillus glucanolyticus</i> AH12  | -           | -                              | -                              | -   |
| <i>Micrococcus luteus</i> AH18            | -           | -                              | -                              | -   |

|                                            |   |   |   |   |
|--------------------------------------------|---|---|---|---|
| <i>Bacillus simplex</i> AH24               | - | - | + | + |
| <i>Bacillus mojavenensis</i> PH1           | + | - | - | - |
| <i>Bacillus subtilis</i> PH4               | + | - | - | - |
| <i>Pseudomonas</i> sp. PH6                 | - | + | - | - |
| <i>Bacillus circulans</i> PH11             | - | - | - | - |
| <i>Bacillus oceanisediminis</i> PH12       | - | - | - | - |
| <i>Stenotrophomonas</i> sp. PH13           | - | - | - | - |
| <i>Pseudomonas corrugate</i> PH17          | - | + | - | - |
| <i>Bacillus simplex</i> PH21               | - | - | - | - |
| <i>Pseudoarthrobacter oxydans</i> PH24     | - | - | - | - |
| <i>Bacillus mojavenensis</i> RR3           | + | - | + | - |
| <i>Pseudomonas thivervalensis</i> RR5      | - | - | + | - |
| <i>Paenibacillus glucanolyticus</i> RR10   | - | - | - | - |
| <i>Bacillus simplex</i> RR11               | - | - | + | - |
| <i>Kocuria rosea</i> RR16                  | - | - | - | - |
| <i>Paenibacillus illinoisensis</i> RR20    | - | + | + | - |
| <i>Fictibacillus arsenicus</i> RR21        | - | + | - | - |
| <i>Paenibacillus amylolyticus</i> RR22     | - | - | + | - |
| <i>Bacillus mojavenensis</i> SF1           | + | - | + | - |
| <i>Saccharibacillus</i> sp. SF2            | - | - | - | - |
| <i>Pseudomonas</i> sp. SF4                 | - | - | - | + |
| <i>Bacillus subtilis</i> SF6               | + | - | + | - |
| <i>Bacillus muralis</i> SF7                | - | - | + | - |
| <i>Bacillus oceanisediminis</i> SF13       | - | - | - | - |
| <i>Arthrobacter pascens</i> SF18           | - | - | - | - |
| <i>Fictibacillus arsenicus</i> SF23        | - | - | - | - |
| <i>Bacillus firmus</i> SF25                | - | - | - | + |
| <i>Paenibacillus amylolyticus</i> SAT3     | - | - | + | - |
| <i>Pseudomonas</i> sp. SAT5                | - | + | + | - |
| <i>Bacillus atrophaeus</i> SAT6            | + | + | + | - |
| <i>Bacillus endophyticus</i> SAT9          | - | - | + | + |
| <i>Bacillus jeotgali</i> SAT10             | - | - | - | - |
| <i>Pseudoarthrobacter</i> sp. SAT13        | - | + | - | + |
| <i>Lactobacillus</i> sp. SAT21             | - | - | - | + |
| <i>Bacillus endophyticus</i> ST4           | - | + | + | + |
| <i>Paenibacillus glucanolyticus</i> ST6    | + | - | - | - |
| <i>Bacillus subtilis</i> ST10              | - | + | + | - |
| <i>Bacillus mojavenensis</i> ST12          | + | - | + | + |
| <i>Advenella kashmirensis</i> ST15         | - | + | + | - |
| <i>Bacillus muralis</i> ST16               | - | - | + | - |
| <i>Microbacterium esteraromaticum</i> ST18 | - | + | - | - |
| <i>Bacillus atrophaeus</i> TM7             | + | + | + | - |
| <i>Bacillus mojavenensis</i> TM12          | + | - | + | - |
| <i>Bacillus oceanisediminis</i> TM15       | - | - | - | - |
| <i>Paenibacillus glucanolyticus</i> TM29   | - | - | - | - |
