# Supplementary material
Source: MDPI journal article supplement (https://www.mdpi.com/2227-9717/11/10/2907)
Supplement: s1 [file s1]

**Table S1.** Identification, growth temperature ranges and NaCl tolerance (evaluated as Minimum Inhibitory Concentration, MIC) of bacterial strains isolated from *Cleome arabica*. N.D. indicates not determined (the species is a potential human opportunistic pathogens or belongs to *Streptomyces* genus which is difficult to dissolve in a liquid growth medium).

| Strain | MALDI-TOF Identification             | Growth Temperature |      |      |      | NaCl tolerance |
|--------|--------------------------------------|--------------------|------|------|------|----------------|
|        |                                      | 4°C                | 28°C | 37°C | 42°C |                |
| CA1    | <i>Domibacillus sp.</i>              | •                  | •    | •    | •    | 14.4%          |
| CA2    | <i>Staphylococcus epidermidis</i>    |                    | •    | •    | •    | N.D.           |
| CA3    | <i>Bacillus sp.</i>                  |                    | •    | •    | •    | 14.4%          |
| CA4    | <i>Bacillus endophyticus</i>         | •                  | •    | •    | •    | 14.4%          |
| CA5    | <i>Bacillus sp.</i>                  |                    | •    | •    | •    | 14.4%          |
| CA6    | <i>Bacillus sp.</i>                  |                    | •    | •    | •    | 28.8%          |
| CA7    | <i>Bacillus sp.</i>                  |                    | •    | •    | •    | 28.8%          |
| CA8    | <i>Bacillus sp.</i>                  | •                  | •    | •    | •    | 14.4%          |
| CA9    | <i>Bacillus niacini</i>              |                    | •    | •    |      | 14.4%          |
| CA10   | <i>Acinetobacter dijkshoorniae</i>   |                    | •    | •    | •    | 28.8%          |
| CA11   | <i>Streptomyces sp.</i>              |                    | •    |      |      | N.D.           |
| CA12   | <i>Arthrobacter crystallopoietes</i> |                    | •    | •    |      | 14.4%          |
| CA14   | <i>Bacillus sp.</i>                  |                    | •    | •    |      | 14.4%          |
| CA16   | <i>Pseudomonas sp.</i>               | •                  | •    | •    |      | 14.4%          |
| CA17   | <i>Bacillus sp.</i>                  |                    | •    | •    | •    | 28.8%          |
| CA18   | <i>Lactobacillus sp.</i>             |                    | •    | •    |      | 14.4%          |
| CA19   | <i>Arthrobacter crystallopoietes</i> |                    | •    | •    |      | 14.4%          |
| CA20   | <i>Streptomyces sp.</i>              |                    | •    | •    | •    | N.D.           |
| CA21   | <i>Bacillus sp.</i>                  |                    | •    | •    | •    | 14.4%          |
| CA22   | <i>Bacillus sp.</i>                  |                    | •    | •    |      | 14.4%          |
| CA23   | <i>Bacillus sp.</i>                  |                    | •    | •    | •    | 28.8%          |
| CA25   | <i>Arthrobacter sp.</i>              | •                  | •    | •    |      | 14.4%          |

**Table S2.** Identification, growth temperature ranges and NaCl tolerance (evaluated as Minimum Inhibitory Concentration, MIC) of bacterial strains isolated from *Pulicaria undulata*. N.D. indicates not determined (the species is a potential human opportunistic pathogens or belongs to *Streptomyces* genus which is difficult to dissolve in a liquid growth medium).

| Strain | MALDI-TOF Identification          | Growth Temperature |      |      |      | NaCl tolerance |
|--------|-----------------------------------|--------------------|------|------|------|----------------|
|        |                                   | 4°C                | 28°C | 37°C | 42°C |                |
| PU1    | <i>Bacillus sp.</i>               |                    | •    | •    |      | 28.8%          |
| PU2    | <i>Massilia timonae</i>           | •                  | •    | •    |      | 14.4%          |
| PU3    | <i>Bacillus sp.</i>               |                    | •    | •    |      | 28.8%          |
| PU4    | <i>Bacillus licheniformis</i>     |                    | •    | •    | •    | 14.4%          |
| PU5    | <i>Bacillus mojaveensis</i>       |                    | •    | •    | •    | 14.4%          |
| PU6    | <i>Bacillus simplex</i>           |                    | •    | •    | •    | 28.8%          |
| PU7    | <i>Bacillus sp.</i>               |                    | •    | •    | •    | 14.4%          |
| PU8    | <i>Pseudoarthrobacter sp.</i>     |                    | •    | •    |      | 14.4%          |
| PU10   | <i>Microbacterium arborescens</i> | •                  | •    | •    | •    | 14.4%          |
| PU11   | <i>Staphylococcus epidermidis</i> |                    | •    | •    | •    | N.D.           |
| PU13   | <i>Streptomyces sp.</i>           |                    | •    | •    | •    | N.D.           |
| PU14   | <i>Pseudoarthrobacter oxydans</i> |                    | •    | •    |      | 14,4%          |
| PU15   | <i>Pseudoarthrobacter oxydans</i> |                    | •    | •    |      | 14,4%          |
| PU17   | <i>Bacillus sp.</i>               |                    | •    | •    |      | 28.8%          |
| PU18   | <i>Bacillus sp.</i>               |                    | •    | •    | •    | 14.4%          |
| PU19   | <i>Staphylococcus epidermidis</i> |                    | •    | •    | •    | N.D.           |
| PU21   | <i>Pseudoarthrobacter oxydans</i> |                    | •    | •    |      | 14,4%          |
| PU22   | <i>Streptomyces sp.</i>           |                    | •    |      |      | N.D.           |
| PU23   | <i>Kocuria sp.</i>                |                    | •    | •    |      | 14.4%          |
| PU24   | <i>Kocuria rosea</i>              |                    | •    |      |      | 14.4%          |

**Table S3.** Identification, growth temperature ranges and NaCl tolerance (evaluated as Minimum Inhibitory Concentration, MIC) of bacterial strains isolated from *Reseda villosa*. N.D. indicates not determined (the species is a potential human opportunistic pathogens or belongs to *Streptomyces* genus which is difficult to dissolve in a liquid growth medium).

| Strain | MALDI-TOF Identification            | Growth Temperature |      |      |      | NaCl tolerance |
|--------|-------------------------------------|--------------------|------|------|------|----------------|
|        |                                     | 4°C                | 28°C | 37°C | 42°C |                |
| RV1    | <i>Bacillus</i> sp.                 |                    | •    | •    | •    | 28.8%          |
| RV2    | <i>Bacillus endophyticus</i>        | •                  | •    | •    | •    | 14.4%          |
| RV3    | <i>Fictibacillus barbaricus</i>     |                    | •    | •    | •    | 14.4%          |
| RV4    | <i>Bacillus endophyticus</i>        | •                  | •    | •    | •    | 14.4%          |
| RV5    | <i>Bacillus</i> sp.                 | •                  | •    | •    | •    | 14.4%          |
| RV6    | <i>Paenibacillus pabuli</i>         | •                  | •    | •    |      | 14.4%          |
| RV7    | <i>Bacillus subtilis</i>            |                    | •    | •    | •    | 14.4%          |
| RV8    | <i>Bacillus</i> sp.                 |                    | •    | •    | •    | 14.4%          |
| RV9    | <i>Bacillus cereus</i>              |                    | •    | •    | •    | 14.4%          |
| RV10   | <i>Bacillus atrophaeus</i>          | •                  | •    | •    | •    | 14.4%          |
| RV11   | <i>Bacillus</i> sp.                 |                    | •    | •    | •    | 14.4%          |
| RV12   | <i>Bacillus</i> sp.                 |                    | •    | •    | •    | 14.4%          |
| RV13   | <i>Paenibacillus</i> sp.            |                    | •    | •    | •    | 14.4%          |
| RV14   | <i>Micrococcus luteus</i>           | •                  | •    | •    | •    | 14.4%          |
| RV16   | <i>Staphylococcus warneri</i>       |                    | •    | •    | •    | N.D.           |
| RV17   | <i>Micrococcus luteus</i>           | •                  | •    | •    | •    | 14.4%          |
| RV18   | <i>Bacillus simplex</i>             | •                  | •    | •    | •    | 7.2%           |
| RV20   | <i>Bacillus</i> sp.                 |                    | •    | •    | •    | 28.8%          |
| RV21   | <i>Bacillus subtilis</i>            |                    | •    | •    | •    | 14.4%          |
| RV22   | <i>Paenibacillus glucanolyticus</i> |                    | •    | •    | •    | 14.4%          |

**Table S4.** Identification, growth temperature ranges and NaCl tolerance (evaluated as Minimum Inhibitory Concentration, MIC) of bacterial strains isolated from *Zilla spinosa*. N.D. indicates not determined (the species is a potential human opportunistic pathogens or belongs to *Streptomyces* genus which is difficult to dissolve in a liquid growth medium).

| Strain | MALDI-TOF Identification            | Growth Temperature |      |      |      | NaCl tolerance |
|--------|-------------------------------------|--------------------|------|------|------|----------------|
|        |                                     | 4°C                | 28°C | 37°C | 42°C |                |
| ZS2    | <i>Arthrobacter sp.</i>             | •                  | •    | •    |      | 14.4%          |
| ZS3    | <i>Massilia timonae</i>             |                    | •    | •    |      | 14.4%          |
| ZS4    | <i>Paenibacillus sp.</i>            | •                  | •    | •    | •    | 14.4%          |
| ZS5    | <i>Bacillus mojavensis</i>          |                    | •    | •    | •    | 14.4%          |
| ZS6    | <i>Bacillus sp.</i>                 | •                  | •    | •    | •    | 14.4%          |
| ZS7    | <i>Bacillus sp.</i>                 |                    | •    | •    | •    | 14.4%          |
| ZS8    | <i>Bacillus beringensis</i>         | •                  | •    | •    | •    | 28.8%          |
| ZS9    | <i>Bacillus subtilis</i>            | •                  | •    | •    | •    | 14.4%          |
| ZS10   | <i>Bacillus sp.</i>                 |                    | •    | •    | •    | 14.4%          |
| ZS11   | <i>Bacillus subtilis</i>            |                    | •    | •    | •    | 14.4%          |
| ZS12   | <i>Bacillus sp.</i>                 | •                  | •    | •    | •    | 28.8%          |
| ZS13   | <i>Paenibacillus glucanolyticus</i> |                    | •    | •    | •    | 14.4%          |
| ZS14   | <i>Arthrobacter sp.</i>             | •                  | •    | •    |      | 14.4%          |
| ZS15   | <i>Pseudoarthrobacter oxydans</i>   | •                  | •    | •    |      | 14.4%          |
| ZS16   | <i>Pseudoarthrobacter sp.</i>       |                    | •    | •    |      | 14.4%          |
| ZS17   | <i>Microbacterium sp.</i>           |                    | •    | •    | •    | 14.4%          |
| ZS19   | <i>Arthrobacter sp.</i>             | •                  | •    | •    |      | 14.4%          |
| ZS21   | <i>Streptomyces sp.</i>             | •                  | •    | •    |      | N.D.           |
| ZS22   | <i>Pseudoarthrobacter oxydans</i>   | •                  | •    | •    |      | 14.4%          |
| ZS24   | <i>Oceanobacillus sp.</i>           |                    | •    | •    |      | 14.4%          |
| ZS25   | <i>Paenibacillus lacyis</i>         |                    | •    | •    | •    | 14.4%          |

**Table S5.** Identification, growth temperature ranges and NaCl tolerance (evaluated as Minimum Inhibitory Concentration, MIC) of bacterial strains isolated from *Artemisia herba-alba*.

| Strain | MALDI-TOF Identification          | Growth Temperature |      |      |      | NaCl tolerance |
|--------|-----------------------------------|--------------------|------|------|------|----------------|
|        |                                   | 4°C                | 28°C | 37°C | 42°C |                |
| AHA1   | <i>Bacillus endophyticus</i>      |                    | •    | •    | •    | 14.4%          |
| AHA2   | <i>Pseudomonas corrugata</i>      |                    | •    |      |      | 14.4%          |
| AHA3   | <i>Pseudomonas chlororaphis</i>   |                    | •    |      |      | 14.4%          |
| AHA4   | <i>Bacillus endophyticus</i>      | •                  | •    | •    | •    | 14.4%          |
| AHA5   | <i>Bacillus indicus</i>           | •                  | •    | •    | •    | 14.4%          |
| AHA6   | <i>Variovorax paradoxus</i>       |                    | •    | •    |      | 14.4%          |
| AHA7   | <i>Paenarthrobacter aurescens</i> |                    | •    |      |      | 14.4%          |
| AHA8   | <i>Bacillus sp.</i>               |                    | •    | •    | •    | 14.4%          |
| AHA9   | <i>Bacillus indicus</i>           |                    | •    | •    | •    | 28.8%          |
| AHA10  | <i>Bacillus sp.</i>               |                    | •    | •    | •    | 14.4%          |
| AHA11  | <i>Pseudomonas thivervalensis</i> |                    | •    | •    |      | 14.4%          |
| AHA12  | <i>Bacillus simplex</i>           |                    | •    | •    | •    | 14.4%          |
| AHA13  | <i>Bacillus idriensis</i>         |                    | •    | •    | •    | 14.4%          |
| AHA15  | <i>Bacillus simplex</i>           |                    | •    | •    | •    | 14.4%          |
| AHA16  | <i>Pseudoarthrobacter sp.</i>     |                    | •    | •    |      | 14.4%          |
| AHA17  | <i>Cellulosimicrobium sp.</i>     | •                  | •    | •    | •    | 14.4%          |
| AHA18  | <i>Bacillus sp.</i>               |                    | •    | •    | •    | 14.4%          |
| AHA20  | <i>Pseudomonas sp.</i>            |                    | •    | •    |      | 14.4%          |
| AHA22  | <i>Pseudoarthrobacter sp.</i>     |                    | •    | •    |      | 14.4%          |
| AHA23  | <i>Microbacterium paludicola</i>  |                    | •    | •    | •    | 14.4%          |
| AHA24  | <i>Bacillus endophyticus</i>      |                    | •    | •    | •    | 14.4%          |

**Table S6.** Identification, growth temperature ranges and NaCl tolerance (evaluated as Minimum Inhibitory Concentration, MIC) of bacterial strains isolated from *Arthrophytum scoparium*. N.D. indicates not determined (the species is a potential human opportunistic pathogens or belongs to *Streptomyces* genus which is difficult to dissolve in a liquid growth medium).

| Strain | MALDI-TOF Identification   | Growth temperature |      |      |      | NaCl tolerance |
|--------|----------------------------|--------------------|------|------|------|----------------|
|        |                            | 4°C                | 28°C | 37°C | 42°C |                |
| AS1    | <i>Bacillus cibi</i>       | •                  | •    | •    | •    | 14.4%          |
| AS2    | <i>Bacillus niacini</i>    | •                  | •    | •    | •    | 14.4%          |
| AS3    | <i>Bacillus sp.</i>        | •                  | •    | •    | •    | 28.8%          |
| AS4    | <i>Bacillus niacini</i>    | •                  | •    | •    | •    | 14.4%          |
| AS5    | <i>Bacillus simplex</i>    | •                  | •    | •    | •    | 14.4%          |
| AS6    | <i>Bacillus indicus</i>    | •                  | •    | •    | •    | 14.4%          |
| AS7    | <i>Bacillus subtilis</i>   | •                  | •    | •    | •    | 14.4%          |
| AS8    | <i>Bacillus subtilis</i>   |                    | •    | •    | •    | 14.4%          |
| AS9    | <i>Bacillus cereus</i>     | •                  | •    | •    | •    | 28.8%          |
| AS10   | <i>Streptomyces sp.</i>    | •                  | •    | •    | •    | N.D.           |
| AS11   | <i>Bacillus sp.</i>        |                    | •    | •    |      | 14.4%          |
| AS12   | <i>Streptomyces sp.</i>    |                    | •    | •    |      | N.D.           |
| AS13   | <i>Streptomyces sp.</i>    |                    | •    | •    |      | N.D.           |
| AS15   | <i>Bacillus subtilis</i>   | •                  | •    | •    | •    | 14.4%          |
| AS16   | <i>Bacillus sp.</i>        | •                  | •    | •    | •    | 14.4%          |
| AS17   | <i>Bacillus sp.</i>        | •                  | •    | •    | •    | 28.8%          |
| AS18   | <i>Bacillus sp.</i>        | •                  | •    | •    |      | 28.8%          |
| AS19   | <i>Bacillus subtilis</i>   |                    | •    | •    | •    | 14.4%          |
| AS20   | <i>Bacillus atrophaeus</i> |                    | •    | •    | •    | 14.4%          |
| AS22   | <i>Bacillus subtilis</i>   |                    | •    | •    |      | 14.4%          |
| AS23   | <i>Bacillus sp.</i>        | •                  | •    | •    | •    | 28.8%          |
| AS24   | <i>Bacillus sp.</i>        |                    | •    | •    | •    | 28.8%          |
| AS25   | <i>Bacillus muralis</i>    | •                  | •    | •    | •    | 28.8%          |

**Table S7.** Identification, growth temperature ranges and NaCl tolerance (evaluated as Minimum Inhibitory Concentration, MIC) of bacterial strains isolated from *Astragalus armatus*. N.D. indicates not determined (the species is a potential human opportunistic pathogens or belongs to *Streptomyces* genus which is difficult to dissolve in a liquid growth medium).

| Strain | MALDI-TOF Identification          | Growth Temperature |      |      |      | NaCl tolerance |
|--------|-----------------------------------|--------------------|------|------|------|----------------|
|        |                                   | 4°C                | 28°C | 37°C | 42°C |                |
| AA1    | <i>Pseudoarthrobacter sp.</i>     |                    | •    | •    |      | 14.4%          |
| AA2    | <i>Bacillus atrophaeus</i>        | •                  | •    | •    | •    | 28.8%          |
| AA3    | <i>Bacillus simplex</i>           | •                  | •    | •    | •    | 28.8%          |
| AA4    | <i>Bacillus sp.</i>               | •                  | •    | •    | •    | 14.4%          |
| AA5    | <i>Bacillus niacini</i>           | •                  | •    | •    | •    | 14.4%          |
| AA6    | <i>Bacillus muralis</i>           | •                  | •    | •    | •    | 14.4%          |
| AA7    | <i>Bacillus muralis</i>           | •                  | •    | •    | •    | 14.4%          |
| AA8    | <i>Bacillus sp.</i>               |                    | •    | •    | •    | 28.8%          |
| AA9    | <i>Bacillus simplex</i>           |                    | •    | •    | •    | 14.4%          |
| AA10   | <i>Pseudoarthrobacter sp.</i>     | •                  | •    | •    |      | 14.4%          |
| AA11   | <i>Bacillus muralis</i>           | •                  | •    | •    | •    | 14.4%          |
| AA12   | <i>Sporosarcina sp.</i>           | •                  | •    | •    | •    | 14.4%          |
| AA13   | <i>Staphylococcus epidermidis</i> |                    | •    | •    | •    | N.D.           |
| AA14   | <i>Bacillus muralis</i>           | •                  | •    | •    | •    | 1.4%           |
| AA15   | <i>Bacillus sp.</i>               |                    | •    | •    |      | 14.4%          |
| AA16   | <i>Bacillus sp.</i>               |                    | •    | •    | •    | 14.4%          |
| AA17   | <i>Bacillus sp.</i>               |                    | •    | •    | •    | 28.8%          |
| AA18   | <i>Pseudoarthrobacter sp.</i>     | •                  | •    | •    |      | 14.4%          |
| AA19   | <i>Bacillus sp.</i>               |                    | •    | •    | •    | 14.4%          |

**Table S8.** Identification, growth temperature ranges and NaCl tolerance (evaluated as Minimum Inhibitory Concentration, MIC) of bacterial strains isolated from *Atriplex halimus*. N.D. indicates not determined (the species is a potential human opportunistic pathogens or belongs to *Streptomyces* genus which is difficult to dissolve in a liquid growth medium).

| Strain | MALDI-TOF Identification            | Growth Temperature |      |      |      | NaCl tolerance |
|--------|-------------------------------------|--------------------|------|------|------|----------------|
|        |                                     | 4°C                | 28°C | 37°C | 42°C |                |
| AH1    | <i>Bacillus cereus</i>              |                    | •    | •    | •    | 28.8%          |
| AH2    | <i>Paenibacillus glucanolyticus</i> |                    | •    | •    | •    | 14.4%          |
| AH3    | <i>Bacillus atrophaeus</i>          |                    | •    | •    | •    | 14.4%          |
| AH4    | <i>Bacillus muralis</i>             |                    | •    | •    | •    | 14.4%          |
| AH5    | <i>Micrococcus luteus</i>           |                    | •    | •    | •    | 14.4%          |
| AH6    | <i>Paenibacillus amylolyticus</i>   |                    | •    | •    | •    | 14.4%          |
| AH7    | <i>Pseudoarthrobacter sp.</i>       | •                  | •    | •    | •    | 14.4%          |
| AH8    | <i>Bacillus simplex</i>             | •                  | •    | •    | •    | 14.4%          |
| AH9    | <i>Bacillus sp.</i>                 |                    | •    | •    | •    | 28.8%          |
| AH10   | <i>Bacillus simplex</i>             |                    | •    | •    | •    | 14.4%          |
| AH11   | <i>Pseudoarthrobacter sp.</i>       |                    | •    | •    | •    | 14.4%          |
| AH12   | <i>Paenibacillus glucanolyticus</i> |                    | •    | •    | •    | 14.4%          |
| AH13   | <i>Paenibacillus glucanolyticus</i> |                    | •    | •    | •    | 14.4%          |
| AH14   | <i>Bacillus sp.</i>                 |                    | •    | •    | •    | 28.8%          |
| AH16   | <i>Bacillus sp.</i>                 |                    | •    | •    | •    | 14.4%          |
| AH17   | <i>Bacillus sp.</i>                 |                    | •    | •    | •    | 28.8%          |
| AH18   | <i>Micrococcus luteus</i>           |                    | •    | •    | •    | 14.4%          |
| AH19   | <i>Pseudoarthrobacter sp.</i>       |                    | •    | •    | •    | 14.4%          |
| AH20   | <i>Bacillus sp.</i>                 |                    | •    | •    | •    | 28.8%          |
| AH22   | <i>Filifactor sp.</i>               |                    | •    |      |      | 14.4%          |
| AH23   | <i>Streptomyces sp.</i>             |                    | •    | •    | •    | N.D.           |
| AH24   | <i>Bacillus simplex</i>             |                    | •    | •    | •    | 14.4%          |



**Table S9.** Identification, growth temperature ranges and NaCl tolerance (evaluated as Minimum Inhibitory Concentration, MIC) of bacterial strains isolated from *Peganum harmala*. N.D. indicates not determined (the species is a potential human opportunistic pathogens or belongs to *Streptomyces* genus which is difficult to dissolve in a liquid growth medium).

| Strain | MALDI-TOF Identification          | Growth Temperature |      |      |      | NaCl tolerance |
|--------|-----------------------------------|--------------------|------|------|------|----------------|
|        |                                   | 4°C                | 28°C | 37°C | 42°C |                |
| PH1    | <i>Bacillus mojavensis</i>        |                    | •    | •    | •    | 14.4%          |
| PH2    | <i>Bacillus subtilis</i>          |                    | •    | •    | •    | 14.4%          |
| PH3    | <i>Bacillus sp.</i>               |                    | •    | •    |      | 28.8%          |
| PH4    | <i>Bacillus subtilis</i>          |                    | •    | •    | •    | 14.4%          |
| PH5    | <i>Bacillus simplex</i>           |                    | •    | •    | •    | 14.4%          |
| PH6    | <i>Pseudomonas sp.</i>            |                    | •    | •    |      | 14.4%          |
| PH7    | <i>Bacillus oceanisediminis</i>   |                    | •    | •    | •    | 14.4%          |
| PH8    | <i>Bacillus mojavensis</i>        |                    | •    | •    |      | 28.8%          |
| PH10   | <i>Bacillus subtilis</i>          |                    | •    | •    | •    | 14.4%          |
| PH11   | <i>Bacillus circulans</i>         |                    | •    | •    | •    | 14.4%          |
| PH12   | <i>Bacillus oceanisediminis</i>   |                    | •    | •    |      | 14.4%          |
| PH13   | <i>Stenotrophomonas sp.</i>       |                    | •    | •    | •    | 14.4%          |
| PH14   | <i>Bacillus sp.</i>               |                    | •    | •    | •    | 14.4%          |
| PH16   | <i>Pseudoarthrobacter sp.</i>     |                    | •    | •    | •    | 14.4%          |
| PH17   | <i>Pseudomonas corrugata</i>      |                    | •    | •    |      | 14.4%          |
| PH18   | <i>Arthrobacter sp.</i>           |                    | •    | •    | •    | 14.4%          |
| PH19   | <i>Streptomyces sp.</i>           |                    | •    |      |      | N.D.           |
| PH21   | <i>Bacillus simplex</i>           | •                  | •    | •    | •    | 28.8%          |
| PH23   | <i>Bacillus sp.</i>               |                    | •    | •    | •    | 14.4%          |
| PH24   | <i>Pseudoarthrobacter oxydans</i> |                    | •    | •    | •    | 14.4%          |

**Table S10.** Identification, growth temperature ranges and NaCl tolerance (evaluated as Minimum Inhibitory Concentration, MIC) of bacterial strains isolated from *Retama raetam*. N.D. indicates not determined (the species is a potential human opportunistic pathogens or belongs to *Streptomyces* genus which is difficult to dissolve in a liquid growth medium).

| Strain | MALDI-TOF Identification            | Growth Temperature |      |      |      | NaCl tolerance |
|--------|-------------------------------------|--------------------|------|------|------|----------------|
|        |                                     | 4°C                | 28°C | 37°C | 42°C |                |
| RR1    | <i>Bacillus mojavensis</i>          |                    | •    | •    | •    | 14.4%          |
| RR2    | <i>Bacillus simplex</i>             | •                  | •    | •    | •    | 14.4%          |
| RR3    | <i>Bacillus mojavensis</i>          |                    | •    | •    | •    | 14.4%          |
| RR4    | <i>Pseudomonas sp.</i>              | •                  | •    | •    |      | 14.4%          |
| RR5    | <i>Pseudomonas thivervalensis</i>   | •                  | •    | •    |      | 14.4%          |
| RR6    | <i>Pseudomonas corrugata</i>        | •                  | •    | •    |      | 14.4%          |
| RR7    | <i>Domibacillus sp.</i>             | •                  | •    | •    |      | 14.4%          |
| RR8    | <i>Bacillus cereus</i>              |                    | •    | •    | •    | 28.8%          |
| RR9    | <i>Bacillus simplex</i>             |                    | •    | •    | •    | 14.4%          |
| RR10   | <i>Paenibacillus glucanolyticus</i> |                    | •    |      |      | 14.4%          |
| RR11   | <i>Bacillus simplex</i>             | •                  | •    | •    | •    | 28.8%          |
| RR12   | <i>Bacillus sp.</i>                 |                    | •    | •    | •    | 28.8%          |
| RR15   | <i>Streptomyces sp.</i>             |                    | •    | •    | •    | N.D.           |
| RR16   | <i>Kocuria rosea</i>                | •                  | •    | •    |      | 14.4%          |
| RR18   | <i>Bacillus sp.</i>                 |                    | •    | •    |      | 28.8%          |
| RR19   | <i>Bacillus sp.</i>                 |                    | •    | •    | •    | 14.4%          |
| RR20   | <i>Paenibacillus illinoisensis</i>  |                    | •    | •    | •    | 14.4%          |
| RR21   | <i>Fictibacillus arsenicus</i>      |                    | •    | •    | •    | 14.4%          |
| RR22   | <i>Paenibacillus amylolyticus</i>   | •                  | •    | •    |      | 14.4%          |

**Table S11.** Identification, growth temperature ranges and NaCl tolerance (evaluated as Minimum Inhibitory Concentration, MIC) of bacterial strains isolated from *Suaeda fruticosa*.

| Strain | MALDI-TOF Identification          | Growth Temperature |      |      |      | NaCl tolerance |
|--------|-----------------------------------|--------------------|------|------|------|----------------|
|        |                                   | 4°C                | 28°C | 37°C | 42°C |                |
| SF1    | <i>Bacillus mojavensis</i>        | •                  | •    | •    | •    | 14.4%          |
| SF2    | <i>Saccharibacillus</i> sp.       |                    | •    | •    | •    | 14.4%          |
| SF4    | <i>Pseudomonas</i> sp.            |                    | •    | •    |      | 14.4%          |
| SF5    | <i>Bacillus oceanisediminis</i>   |                    | •    | •    | •    | 14.4%          |
| SF6    | <i>Bacillus subtilis</i>          |                    | •    | •    | •    | 14.4%          |
| SF7    | <i>Bacillus muralis</i>           | •                  | •    | •    | •    | 14.4%          |
| SF8    | <i>Pseudoarthrobacter</i> sp.     | •                  | •    | •    |      | 14.4%          |
| SF10   | <i>Bacillus oceanisediminis</i>   |                    | •    | •    | •    | 14.4%          |
| SF11   | <i>Bacillus</i> sp.               |                    | •    | •    | •    | 28.8%          |
| SF13   | <i>Bacillus oceanisediminis</i>   |                    | •    | •    | •    | 14.4%          |
| SF15   | <i>Arthrobacter</i> sp.           | •                  | •    | •    | •    | 14.4%          |
| SF16   | <i>Pseudoarthrobacter</i> sp.     | •                  | •    | •    |      | 14.4%          |
| SF17   | <i>Bacillus</i> sp.               |                    | •    | •    |      | 28.8%          |
| SF18   | <i>Arthrobacter pascens</i>       | •                  | •    | •    |      | 14.4%          |
| SF19   | <i>Pseudoarthrobacter oxydans</i> |                    | •    | •    |      | 14.4%          |
| SF20   | <i>Arthrobacter</i> sp.           | •                  | •    | •    | •    | 14.4%          |
| SF21   | <i>Bacillus</i> sp.               | •                  | •    | •    | •    | 28.8%          |
| SF22   | <i>Bacillus muralis</i>           |                    | •    | •    | •    | 28.8%          |
| SF23   | <i>Fictibacillus arsenicus</i>    |                    | •    | •    | •    | 14.4%          |
| SF24   | <i>Pseudomonas</i> sp.            | •                  | •    | •    |      | 14.4%          |
| SF25   | <i>Bacillus firmus</i>            | •                  | •    | •    | •    | 14.4%          |
| SF26   | <i>Bacillus oceanisediminis</i>   | •                  | •    | •    | •    | 14.4%          |

**Table S12.** Identification, growth temperature ranges and NaCl tolerance (evaluated as Minimum Inhibitory Concentration, MIC) of bacterial strains isolated from *Salsola tetragona*.

| Strain | MALDI-TOF Identification          | Growth Temperature |      |      |      | NaCl tolerance |
|--------|-----------------------------------|--------------------|------|------|------|----------------|
|        |                                   | 4°C                | 28°C | 37°C | 42°C |                |
| SAT1   | <i>Bacillus atrophaeus</i>        |                    | •    | •    | •    | 14.4%          |
| SAT3   | <i>Paenibacillus amylolyticus</i> |                    | •    | •    |      | 14.4%          |
| SAT4   | <i>Bacillus</i> sp.               |                    | •    | •    | •    | 14.4%          |
| SAT5   | <i>Pseudomonas</i> sp.            |                    | •    | •    |      | 14.4%          |
| SAT6   | <i>Bacillus atrophaeus</i>        |                    | •    | •    | •    | 14.4%          |
| SAT7   | <i>Bacillus atrophaeus</i>        | •                  | •    | •    | •    | 14.4%          |
| SAT8   | <i>Bacillus</i> sp.               |                    | •    | •    | •    | 14.4%          |
| SAT9   | <i>Bacillus endophyticus</i>      |                    | •    | •    | •    | 28.8%          |
| SAT10  | <i>Bacillus jeotgali</i>          |                    | •    | •    | •    | 14.4%          |
| SAT11  | <i>Bacillus</i> sp.               |                    | •    | •    | •    | 14.4%          |
| SAT12  | <i>Paenarthrobacter</i> sp.       | •                  | •    | •    | •    | 14.4%          |
| SAT13  | <i>Pseudoarthrobacter</i> sp.     |                    | •    | •    | •    | 14.4%          |
| SAT14  | <i>Pseudomonas</i> sp.            | •                  | •    | •    |      | 14.4%          |
| SAT16  | <i>Paenibacillus</i> sp.          |                    | •    | •    | •    | 14.4%          |
| SAT17  | <i>Pseudoarthrobacter</i> sp.     |                    | •    | •    | •    | 14.4%          |
| SAT18  | <i>Bacillus</i> sp.               |                    | •    | •    | •    | 14.4%          |
| SAT19  | <i>Lactobacillus</i> sp.          |                    | •    | •    |      | 14.4%          |
| SAT20  | <i>Bacillus cereus</i>            |                    | •    | •    | •    | 28.8%          |
| SAT21  | <i>Lactobacillus</i> sp.          |                    | •    | •    |      | 14.4%          |

**Table S13.** Identification, growth temperature ranges and NaCl tolerance (evaluated as Minimum Inhibitory Concentration, MIC) of bacterial strains isolated from *Stipa tenacissima*.

| Strain | MALDI-TOF Identification              | Growth Temperature |      |      |      | NaCl tolerance |
|--------|---------------------------------------|--------------------|------|------|------|----------------|
|        |                                       | 4°C                | 28°C | 37°C | 42°C |                |
| ST1    | <i>Bacillus sp.</i>                   |                    | •    | •    | •    | 14,4%          |
| ST2    | <i>Bacillus jeotgali</i>              |                    | •    | •    | •    | 14,4%          |
| ST3    | <i>Bacillus sp.</i>                   | •                  | •    | •    | •    | 28,8%          |
| ST4    | <i>Bacillus endophyticus</i>          | •                  | •    | •    | •    | 28,8%          |
| ST5    | <i>Bacillus sp.</i>                   |                    | •    | •    | •    | 14,4%          |
| ST6    | <i>Paenibacillus glucanolyticus</i>   |                    | •    | •    | •    | 14,4%          |
| ST7    | <i>Bacillus sp.</i>                   |                    | •    | •    | •    | 14,4%          |
| ST8    | <i>Bacillus sp.</i>                   |                    | •    | •    | •    | 14,4%          |
| ST9    | <i>Paenibacillus sp.</i>              |                    | •    | •    | •    | 14,4%          |
| ST10   | <i>Bacillus subtilis</i>              |                    | •    | •    | •    | 28,8%          |
| ST11   | <i>Bacillus atrophaeus</i>            | •                  | •    | •    | •    | 28,8%          |
| ST12   | <i>Bacillus mojavensis</i>            |                    | •    | •    | •    | 28,8%          |
| ST13   | <i>Paenibacillus glucanolyticus</i>   |                    | •    |      |      | 14,4%          |
| ST14   | <i>Advenella sp.</i>                  | •                  | •    | •    | •    | 28,8%          |
| ST15   | <i>Advenella kashmirensis</i>         | •                  | •    | •    | •    | 28,8%          |
| ST16   | <i>Bacillus muralis</i>               |                    | •    | •    | •    | 14,4%          |
| ST17   | <i>Bacillus sp.</i>                   |                    | •    | •    | •    | 14,4%          |
| ST18   | <i>Microbacterium esteraromaticum</i> |                    | •    | •    |      | 14,4%          |
| ST19   | <i>Brevundimonas sp.</i>              | •                  | •    | •    |      | 14,4%          |
| ST22   | <i>Advenella sp.</i>                  | •                  | •    | •    |      | 28,8%          |
| ST23   | <i>Bacillus sp.</i>                   |                    | •    | •    | •    | 28,8%          |
| ST24   | <i>Kocuria sp.</i>                    |                    | •    | •    | •    | 14,4%          |

**Table S14.** Identification, growth temperature ranges and NaCl tolerance (evaluated as Minimum Inhibitory Concentration, MIC) of bacterial strains isolated from *Thymelaea microphylla*. N.D. indicates not determined (the species is a potential human opportunistic pathogens or belongs to *Streptomyces* genus which is difficult to dissolve in a liquid growth medium).

| Strain | MALDI-TOF Identification            | Growth Temperature |      |      |      | NaCl tolerance |
|--------|-------------------------------------|--------------------|------|------|------|----------------|
|        |                                     | 4°C                | 28°C | 37°C | 42°C |                |
| TM1    | <i>Bacillus sp.</i>                 |                    | •    | •    | •    | 28.8%          |
| TM3    | <i>Bacillus sp.</i>                 |                    | •    | •    |      | 14.4%          |
| TM4    | <i>Staphylococcus epidermidis</i>   |                    | •    | •    | •    | N.D.           |
| TM7    | <i>Bacillus atrophaeus</i>          | •                  | •    | •    | •    | 14.4%          |
| TM9    | <i>Bacillus mojavensis</i>          |                    | •    | •    | •    | 14.4%          |
| TM12   | <i>Bacillus mojavensis</i>          |                    | •    | •    | •    | 14.4%          |
| TM14   | <i>Staphylococcus epidermidis</i>   |                    | •    | •    | •    | N.D.           |
| TM15   | <i>Bacillus oceanisediminis</i>     |                    | •    | •    | •    | 14.4%          |
| TM17   | <i>Bacillus mojavensis</i>          |                    | •    | •    | •    | 14.4%          |
| TM18   | <i>Bacillus cereus</i>              |                    | •    | •    | •    | 28.8%          |
| TM20   | <i>Bacillus sp.</i>                 | •                  | •    | •    | •    | 14.4%          |
| TM22   | <i>Bacillus mojavensis</i>          |                    | •    | •    | •    | 14.4%          |
| TM23   | <i>Bacillus sp.</i>                 |                    | •    | •    | •    | 28.8%          |
| TM26   | <i>Bacillus mojavensis</i>          |                    | •    | •    | •    | 14.4%          |
| TM27   | <i>Paenibacillus glucanolyticus</i> |                    | •    | •    |      | 14.4%          |
| TM28   | <i>Bacillus mojavensis</i>          |                    | •    | •    | •    | 14.4%          |
| TM29   | <i>Paenibacillus glucanolyticus</i> |                    | •    | •    |      | 14.4%          |
| TM30   | <i>Bacillus atrophaeus</i>          | •                  | •    | •    | •    | 14.4%          |
